# Supplementary material for: Conservation actions and ecological context: optimizing coral reef local management in the Dominican Republic
Source: PeerJ. 2021 Mar 9;9:e10925. doi: 10.7717/peerj.10925 (PMC7953877; doi:10.7717/peerj.10925)
Supplement: Supplemental Information 4 [file peerj-09-10925-s004.xls]

## Sheet: Cover by specie
MPA	SITE	REEF CODE	CORAL COVER by SPECIE
			MMEA	UGAR	OFAV	EFAS	MYCE	PPOR	PDIV	PFUR	PAST	DLAB	PSTR	MADR	ACER	DCYL	MCAV	SSID	CNAT	OFRA	OANN	SINT	SRAD	HCUC	MARE	MANG
SERMS	Dominicus reef_1	DR1	2.12766	10.6383	38.2979	0	0	0	0	2.12766	4.25532	0	0	0	0	0	12.766	4.25532	0	25.5319	0	0	0	0	0	0
	Dominicus reef_2	DR2	0	12.5	37.5	0	0	0	0	6.25	0	0	0	6.25	0	0	18.75	3.125	0	15.625	0	0	0	0	0	0
	Dominicus reef_3	DR3	8.51064	27.6596	27.6596	0	0	0	0	0	8.51064	0	0	2.12766	0	0	4.25532	0	0	21.2766	0	0	0	0	0	0
	Dominicus reef_4	DR4	0	5	0	0	0	0	0	0	7.5	5	5	0	0	0	12.5	0	5	57.5	0	0	0	0	0	2.5
	Dominicus reef_5	DR5	3.44828	24.1379	10.3448	0	6.89655	0	0	0	0	13.7931	0	0	0	0	6.89655	6.89655	0	27.5862	0	0	0	0	0	0
	Dominicus reef_6	DR6	10	30	10	0	0	0	0	13.3333	6.66667	0	0	0	0	0	10	0	0	20	0	0	0	0	0	0
GCNRA	El Peñón_1	Pe1	0	20.8333	33.3333	0	0	0	0	4.16667	12.5	0	0	0	0	0	12.5	16.6667	0	0	0	0	0	0	0	0
	El Peñón_2	Pe2	5.55556	22.2222	25	0	0	0	0	0	2.77778	0	11.1111	11.1111	0	0	0	16.6667	0	5.55556	0	0	0	0	0	0
	El Peñón_3	Pe3	3.57143	28.5714	32.1429	0	0	3.57143	0	7.14286	17.8571	0	0	0	0	0	0	7.14286	0	0	0	0	0	0	0	0
	El Peñón_4	Pe4	0	41.1765	26.4706	0	0	0	0	5.88235	11.7647	0	0	0	0	0	2.94118	5.88235	0	5.88235	0	0	0	0	0	0
	El Peñón_5	Pe5	6.25	46.875	12.5	0	0	12.5	0	3.125	3.125	0	0	0	0	0	0	0	0	12.5	0	3.125	0	0	0	0
	El Peñón_6	Pe6	9.09091	30.303	12.1212	0	0	6.06061	0	6.06061	3.0303	0	0	0	0	0	18.1818	9.09091	0	6.06061	0	0	0	0	0	0
CNP	Cacón_1	PC1	3.125	18.75	0	0	0	9.375	0	6.25	21.875	0	15.625	0	0	0	0	6.25	0	12.5	0	6.25	0	0	0	0
	Cacón_2	PC2	3.7037	33.3333	11.1111	0	0	3.7037	0	7.40741	11.1111	0	0	3.7037	0	0	3.7037	11.1111	0	3.7037	0	3.7037	0	3.7037	0	0
	Cacón_3	PC3	0	56	4	0	0	0	0	8	12	0	0	0	0	0	0	4	0	4	0	0	4	0	8	0
	Cacón_4	PC4	0	44.4444	0	0	0	0	0	0	5.55556	0	5.55556	11.1111	0	0	0	11.1111	0	22.2222	0	0	0	0	0	0
	Cacón_5	PC5	0	37.5	16.6667	0	0	0	0	0	12.5	0	0	4.16667	0	0	12.5	8.33333	8.33333	0	0	0	0	0	0	0
	Cacón_6	PC6	0	33.3333	0	0	0	0	9.52381	0	14.2857	4.7619	9.52381	0	0	0	14.2857	4.7619	0	9.52381	0	0	0	0	0	0
